# Supplementary material for: Carbon nanoonion-ferrocene conjugates as acceptors in organic photovoltaic devices
Source: Royal Society of Chemistry journal article supplement (doi:10.1039/c9na00135b), 2019-01-01
Supplement: c9na00135b1.pdf [file c9na00135b1.pdf]

## Supporting Information

### Carbon Nanoion-Ferrocene Conjugates as acceptors in organic photovoltaic devices

Diana M. Bobrowska,<sup>a</sup> Halyna Zubyk,<sup>a</sup> Elzbieta Regulska,<sup>a</sup> Elkin Romero,<sup>b</sup> Luis Echegoyen,<sup>b</sup>  
and Marta E. Plonska-Brzezinska<sup>c</sup>

<sup>a</sup> *Institute of Chemistry, University of Bialystok, K. Ciolkowskiego 1K, 15-245 Bialystok, Poland.*

<sup>b</sup> *University of Texas at El Paso, 500 W University Ave., Chemistry and Computer Science Bldg.  
#2.0304, El Paso, TX 79968-8807, USA*

<sup>c</sup> *Department of Organic Chemistry, Faculty of Pharmacy with the Division of Laboratory Medicine,  
Medical University of Bialystok, Mickiewicza 2A, 15-222 Bialystok, Poland,  
E-mail: \*marta.plonska-brzezinska@umb.edu.pl. Phone: (+4885) 748 5683.*

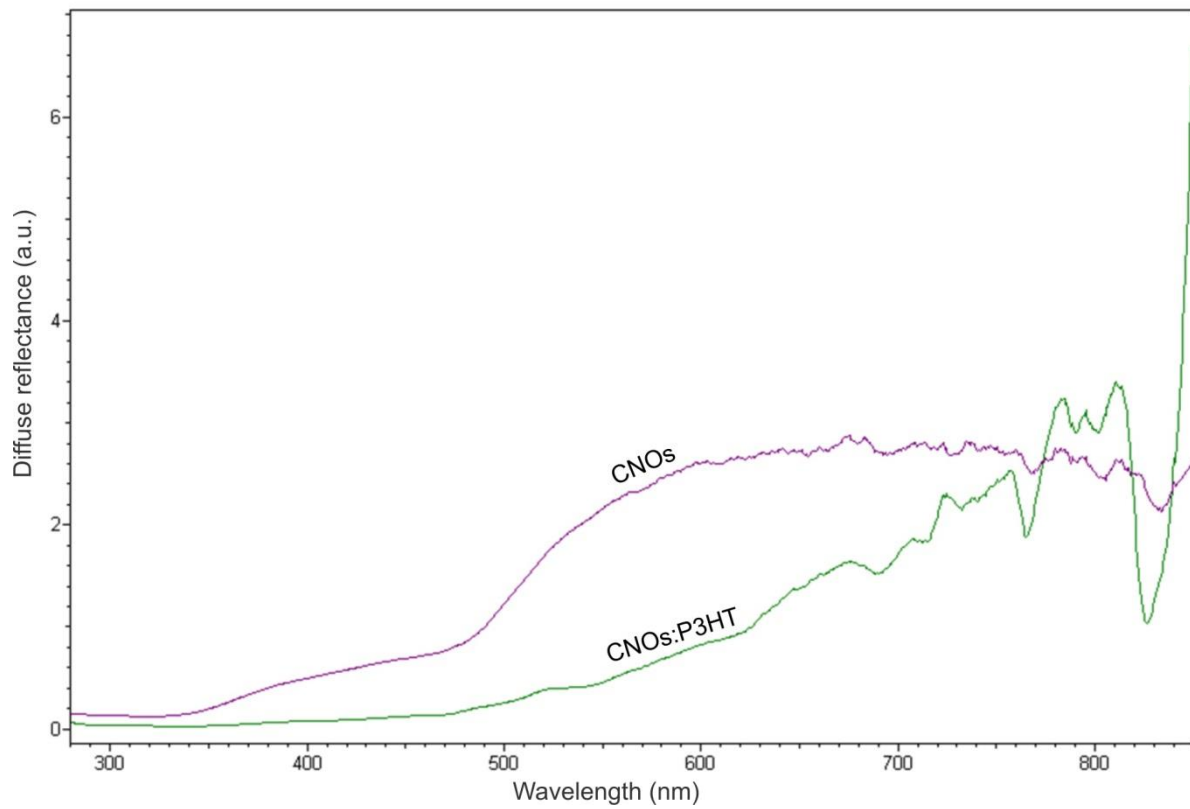

**Fig. S11.** Diffuse reflectance spectra of the CNO and CNO:P3HT layers prepared by spin-coating method.

**Table SII.** The physicochemical parameters of pristine and functionalized CNOs.

| Sample        | BET Surface Area $S_{\text{BET}}$ (m <sup>2</sup> /g) | t-plot micropore area (m <sup>2</sup> /g) | t-Plot external surface area $S_{\text{ext}}$ (m <sup>2</sup> /g) | Cumulative surface area of pores <sup>a</sup> (m <sup>2</sup> /g) | Cumulative surface area of pores <sup>b</sup> (m <sup>2</sup> /g) | t-plot micropore volume (cm <sup>3</sup> /g) | Cumulative volume of pores <sup>a</sup> (cm <sup>3</sup> /g) | Cumulative volume of pores <sup>b</sup> (cm <sup>3</sup> /g) | Average pore width, (nm) <sup>c</sup> | Average pore width, (nm) <sup>d</sup> |
|---------------|-------------------------------------------------------|-------------------------------------------|-------------------------------------------------------------------|-------------------------------------------------------------------|-------------------------------------------------------------------|----------------------------------------------|--------------------------------------------------------------|--------------------------------------------------------------|---------------------------------------|---------------------------------------|
| <b>CNOs</b>   | 454                                                   | 46                                        | 408                                                               | 505                                                               | 547                                                               | 0.0195                                       | 1.660 <sup>[e]</sup>                                         | 1.686                                                        | 13                                    | 12                                    |
| <b>CNO 4</b>  | 201                                                   | 42                                        | 159                                                               | 177                                                               | 195                                                               | 0.0145                                       | 0.927 <sup>[h]</sup>                                         | 0.884                                                        | 21                                    | 18                                    |
| <b>CNO 5</b>  | 108                                                   | 42                                        | 67                                                                | 85                                                                | 110                                                               | 0.0163                                       | 0.360 <sup>[f]</sup>                                         | 0.375                                                        | 17                                    | 14                                    |
| <b>CNO 6</b>  | 214                                                   | 99                                        | 116                                                               | 183                                                               | 200                                                               | 0.0389                                       | 0.715 <sup>[g]</sup>                                         | 0.724                                                        | 16                                    | 15                                    |
| <b>CNO 10</b> | 148                                                   | 19                                        | 129                                                               | 144                                                               | 154                                                               | 0.0062                                       | 0.721 <sup>[i]</sup>                                         | 0.684                                                        | 20                                    | 18                                    |

<sup>a</sup> - based BJH Adsorption method (pores width between 17, 000 Å and 3000,000 Å)

<sup>b</sup> - based BJH Desorption method (pores width between 17, 000 Å and 3000,000 Å)

<sup>c</sup> - based BJH Adsorption method (4v/A), <sup>d</sup> - based BJH Desorption method (4v/A)

Single point adsorption total pore volume of pores less than: (e) 1390 Å diameter at  $p/p^o = 0.9862$ ; (f) 1330 Å diameter at  $p/p^o = 0.9855$ ; (g) 1379 Å diameter at  $p/p^o = 0.9861$ ; (h) 1431 Å diameter at  $p/p^o = 0.9266$ ; (i) 1307 Å diameter at  $p/p^o = 0.9853$ .

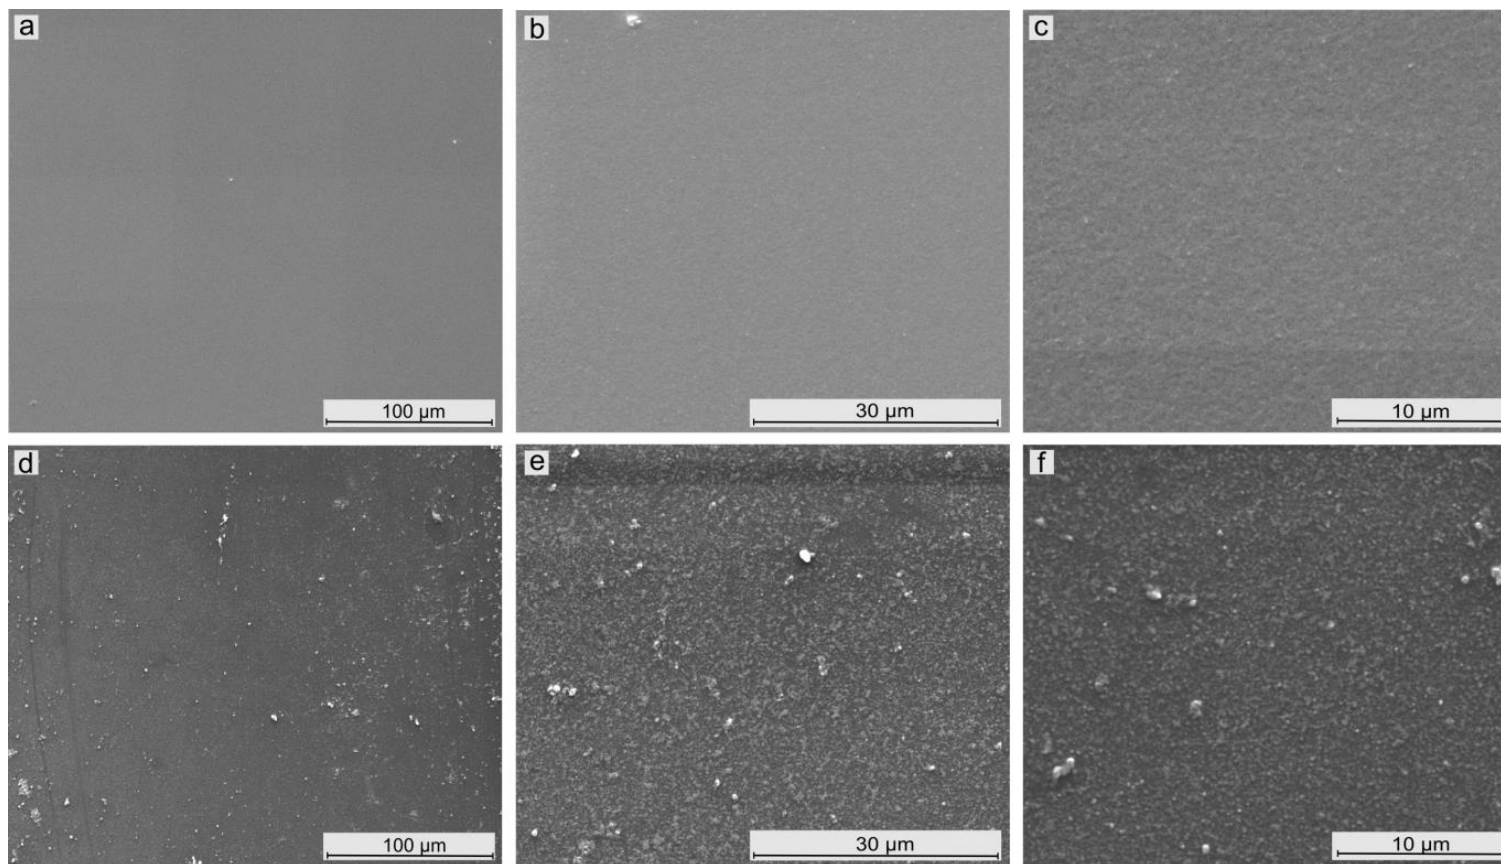

**Fig. S12.** SEM images of (a, b, c) ZnO layer on ITO-coated glass and (d, e, f) P3HT:CNO **4** layer spin-coated on the ZnO/ITO with different magnification: (a, d) 1000x, (b, e) 5000x and (c, f) 10000x. For better quality of SEM images, Au (3 nm thickness layer) was sputtered on the surface.

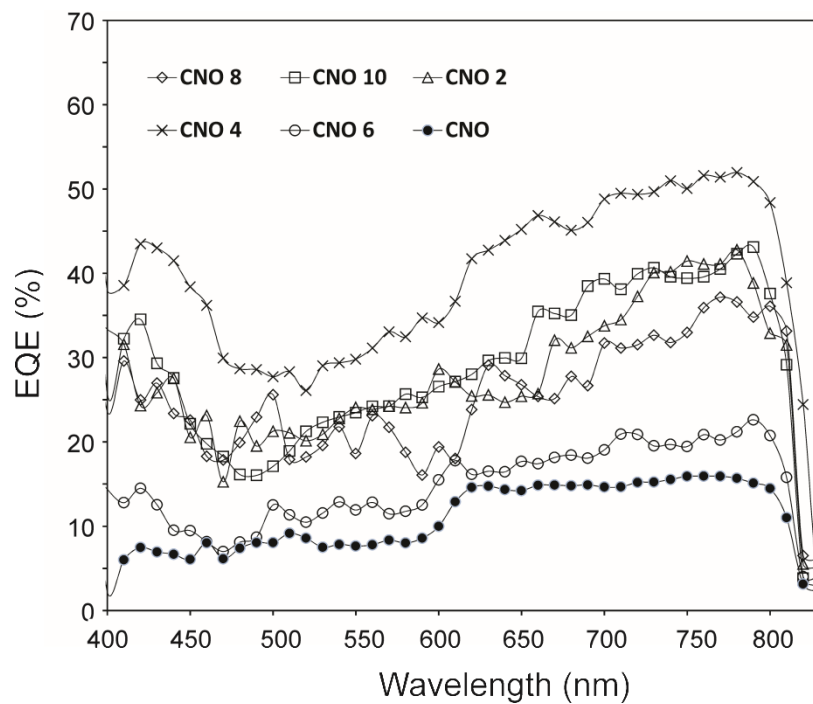

**Fig. S13.** Photoconversion efficiency study - external quantum efficiency for devices based on the CNO derivatives (CNO 2, CNO 4, CNO 6, CNO 8 and CNO 10).
